# Supplementary material for: Neutralization of N501Y mutant SARS-CoV-2 by BNT162b2 vaccine-elicited sera
Source: bioRxiv or medRxiv preprint supplement (doi:10.1101/2021.01.07.425740), 2021-01-07
Supplement: Supplementary file [file media-1.pdf]

# Neutralization of N501Y mutant SARS-CoV-2 by BNT162b2 vaccine-elicited sera

## Supplementary Material

### Table of Contents

#### Materials and Methods

- Construction of isogenic viruses
- Neutralization assay

#### Figures

- Figure S1. Diagram of the N501Y substitution.
- Figure S2. Plaque morphologies of N501 and Y501 viruses.
- Figure S3. Scheme of the BNT162 vaccination and serum sampling.
- Figure S4. Plot of the ratio of PRNT<sub>50</sub> between Y501 and N501 viruses.

#### Tables

- Table S1. PRNT<sub>50</sub> values of 20 BNT162b2 post-immunization sera against N501 and Y501 SARS-CoV-2.

#### References

## **Materials and Methods**

### **Construction of isogenic viruses**

We prepared an isogenic pair of SARS-CoV-2 containing the N501 or Y501 spike protein (Figure S1). The N501Y mutation was generated by an A-to-T substitution at nucleotide 23,063 of the viral genome using an infectious cDNA clone of clinical strain WA1 (2019-nCoV/USA\_WA1/2020).<sup>1</sup> Following a previously reported mutagenesis protocol,<sup>2</sup> we recovered N501 and Y501 viruses with titers of  $>10^7$  plaque-forming units (PFU) per ml. The two viruses developed similar plaque morphologies on Vero E6 cells (Fig. S2).

### **Serum specimens and neutralization assay**

The immunization and serum collection regimen is illustrated schematically in Fig. S3. For measuring neutralization titers, each serum was 2-fold serially diluted in culture medium with the first dilution of 1:40 (dilution range of 1:40 to 1:1280). The diluted serum was incubated with 100 PFU of N501 or Y501 virus at 37 °C for 1 h, after which the serum-virus mixtures were inoculated onto Vero E6 cell monolayer in 6-well plates. A conventional (non-fluorescent) plaque reduction neutralization assay was performed to quantify the serum-mediated virus suppression as previously reported.<sup>3</sup> A minimal serum dilution that suppressed  $>50\%$  of viral plaques is defined as PRNT<sub>50</sub>. A table of the neutralization titers is provided (Table S1). The ratio for each serum of the PRNT<sub>50</sub> against N501 and Y501 virus is plotted in Fig. S4.

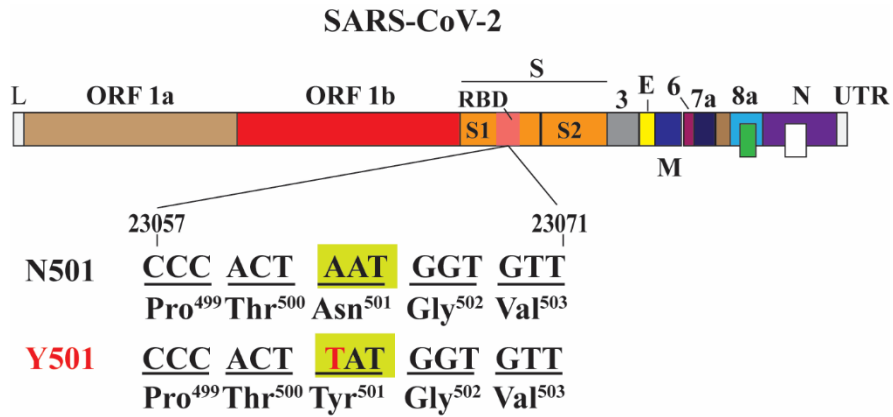

**Figure S1.** Diagram of the N501Y substitution. L – leader sequence; ORF – open reading frame; RBD – receptor binding domain; S – spike glycoprotein; S1 – N-terminal furin cleavage fragment of S; S2 – C-terminal furin cleavage fragment of S; E – envelope protein; M – membrane protein; N – nucleoprotein; UTR – untranslated region.

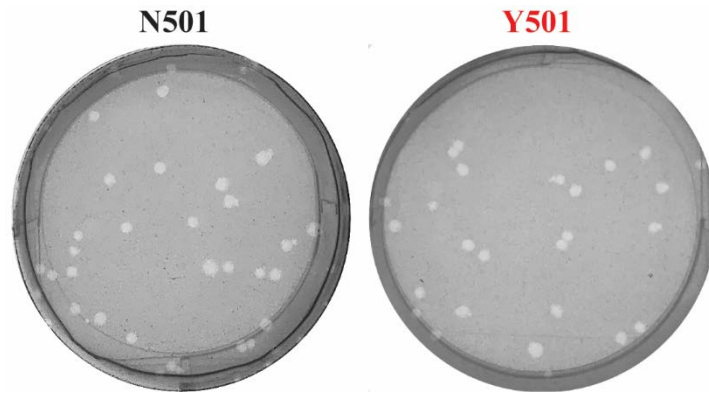

**Figure S2.** Plaque morphologies of N501 and Y501 SARS-CoV-2 on Vero E6 cells.

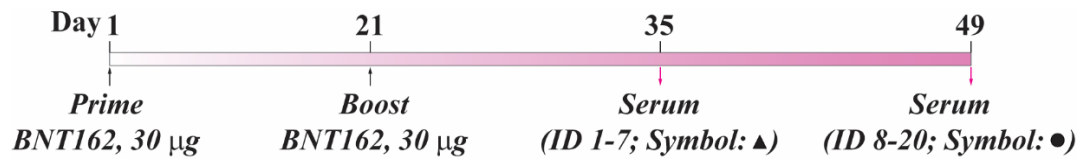

**Figure S3.** Scheme of the BNT162 vaccination and serum sampling.

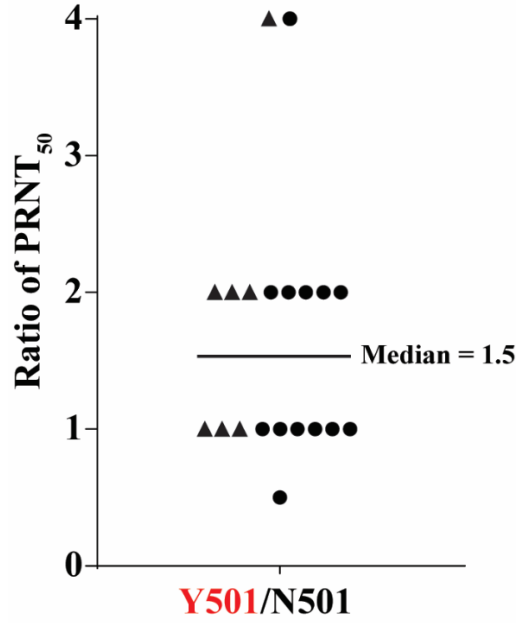

**Figure S4.** Plot of the ratio of PRNT<sub>50</sub> between Y501 and N501 viruses. Triangles represent sera drawn two weeks after the second dose; circles represent sera drawn four weeks after the second dose.

**Table S1.** PRNT<sub>50</sub> values of 20 BNT162b2 post-immunization sera against N501 and Y501 SARS-CoV-2.

| Serum ID | PRNT <sub>50</sub> |      | PRNT <sub>50</sub> ratio<br>(Y501/N501) |
|----------|--------------------|------|-----------------------------------------|
|          | N501               | Y501 |                                         |
| 1        | 160                | 640  | 4                                       |
| 2        | 160                | 320  | 2                                       |
| 3        | 320                | 640  | 2                                       |
| 4        | 80                 | 160  | 2                                       |
| 5        | 160                | 160  | 1                                       |
| 6        | 320                | 320  | 1                                       |
| 7        | 640                | 640  | 1                                       |
| 8        | 160                | 160  | 1                                       |
| 9        | 640                | 640  | 1                                       |
| 10       | 640                | 1280 | 2                                       |
| 11       | 160                | 640  | 4                                       |
| 12       | 320                | 320  | 1                                       |
| 13       | 640                | 1280 | 2                                       |
| 14       | 640                | 320  | 0.5                                     |
| 15       | 320                | 640  | 2                                       |
| 16       | 320                | 640  | 2                                       |
| 17       | 640                | 640  | 1                                       |
| 18       | 640                | 1280 | 2                                       |
| 19       | 640                | 640  | 1                                       |
| 20       | 640                | 640  | 1                                       |

## Supplementary References

1. Xie X, Muruato A, Lokugamage KG, et al. An Infectious cDNA Clone of SARS-CoV-2. *Cell Host Microbe* 2020;27:841-8 e3.
2. Plante JA, Liu Y, Liu J, et al. Spike mutation D614G alters SARS-CoV-2 fitness. *Nature* 2020.
3. Muruato AE, Fontes-Garfias CR, Ren P, et al. A high-throughput neutralizing antibody assay for COVID-19 diagnosis and vaccine evaluation. *Nat Commun* 2020;11:4059.
